# Supplementary material for: Offline Digital Education for Medical Students: Systematic Review and Meta-Analysis by the Digital Health Education Collaboration
Source: PubMed Central journal article supplement (PMC6452290; doi:10.2196/13165), 2019-03-25
Supplement: jmir_v21i3e13165_app2.pdf [file jmir_v21i3e13165_app2.pdf]

## Multimedia Appendix 2: Characteristics of included studies.

| Study ID (Author Year), Reference, Study Design, country | Population (N <sup>a</sup> ), Medical student (year) | Setting, Source of Funding   | Field of study                         | Intervention type                       | Duration of the intervention | Control              | Outcomes                                       |
|----------------------------------------------------------|------------------------------------------------------|------------------------------|----------------------------------------|-----------------------------------------|------------------------------|----------------------|------------------------------------------------|
| Ackermann 2010 [35], RCT <sup>b</sup> , Germany          | 20, Not specified                                    | University, NR <sup>c</sup>  | Surgery (Orthopedic Surgery)           | CD-ROM <sup>d</sup>                     | 4-6 hours                    | Traditional learning | Skill                                          |
| Amesse 2008 [36], RCT, USA                               | 36, Third year                                       | Hospital, NR                 | Radiology                              | CD-ROM                                  | 1.5 hours                    | Traditional learning | Knowledge                                      |
| Armstrong 2009 [37], RCT, UK                             | 21, Fourth year                                      | Hospital, NR                 | Arterial Blood Gas Interpretation      | PowerPoint Presentation                 | 1 week                       | Traditional learning | 1) Knowledge<br>2) Satisfaction                |
| Carrero 2009 [38], RCT, Spain                            | 68, Third year                                       | University, NR               | Basic Life Support Algorithms          | PowerPoint Presentation                 | 1 hour                       | Traditional learning | Knowledge                                      |
| Cheng 2017 [39], RCT, USA                                | 41, Second, Third and Fourth Year                    | University, NR               | Orthopedics                            | Computer-based Video                    | 10 minutes                   | Traditional learning | Skill                                          |
| Davis 2008 [40], RCT, UK                                 | 229, First year                                      | University, NR               | Evidence based Medicine                | CD-ROM                                  | 40 minutes                   | Traditional learning | 1) Knowledge<br>2) Attitude                    |
| de Jong 2010 [41], RCT, The Netherlands                  | 107, Third year                                      | University, NR               | Musculoskeletal problems               | PowerPoint Presentation                 | 3 weeks                      | Traditional learning | 1) Knowledge<br>2) Satisfaction                |
| Desch 1991 [42], RCT, USA                                | 78, Third year                                       | University, NR               | Pediatrics (Neonatal Management)       | Software Program                        | 1 week                       | Traditional learning | 1) Knowledge<br>2) Satisfaction<br>3) Cost     |
| Devitt 1999 [43], Australia                              | 90, Second year                                      | University, NR               | Anatomy and Physiology                 | Software Program                        | 2 weeks                      | Software Program     | Knowledge                                      |
| Elves 1997 [44], RCT, UK                                 | 26, Third year                                       | Hospital, IS <sup>e</sup>    | Urology                                | Offline digital education (blended)     | 1 week                       | Traditional learning | 1) Knowledge<br>2) Satisfaction                |
| Fasce 1995 [45], RCT, Chile                              | 100, Fourth year                                     | University, NR               | Medicine (Hypertension)                | Software Program                        | 5 hours                      | Traditional learning | 1) Knowledge<br>2) Attitude<br>3) Satisfaction |
| Finley 1998 [46], RCT, Canada                            | 40, Second year                                      | University, NR               | Medicine (Auscultation of Heart)       | CD-ROM                                  | 3 days                       | Software Program     | 1) Knowledge<br>2) Satisfaction                |
| Gelb 2001 [47], RCT, USA                                 | 107, Not specified                                   | University, NIS <sup>f</sup> | Anatomy                                | Offline digital education (unspecified) | -                            | Traditional learning | 1) Knowledge<br>2) Satisfaction                |
| Green 2011 [48], RCT, USA                                | 121, Second year                                     | Hospital, NIS                | Advanced Care Planning                 | Software Program                        | -                            | Traditional learning | 1) Knowledge<br>2) Skill<br>3) Satisfaction    |
| Hilger 1996 [49], RCT, USA                               | 77, Third year                                       | University, NR               | Medicine (Pharyngitis)                 | Software Program                        | 1 week                       | Traditional learning | 1) Knowledge<br>2) Attitude                    |
| Hudson 2004 [10], RCT, Australia                         | 100, Third year                                      | University, NIS              | Neuroanatomy and neurophysiology       | Software Program                        | 2 weeks                      | Software Program     | Knowledge                                      |
| Holt 2001 [50], RCT, UK                                  | 185, First year                                      | University, NR               | Endocrinology                          | Software Program                        | 6 hours                      | Traditional learning | 1) Knowledge<br>2) Satisfaction<br>3) Cost     |
| Lee 1997 [51], RCT, USA                                  | 82, Second year                                      | University, NR               | Biochemistry/Acid-Base Problem Solving | Software Program                        | 2.5 hours                    | Traditional learning | 1) Knowledge<br>2) Satisfaction                |
| MacFadyen 1993 [52], RCT, Canada                         | 54, Fourth year                                      | University, NIS              | Clinical pharmacology                  | Offline digital education (unspecified) | 12.2 hours (average)         | Traditional learning | 1) Knowledge<br>2) Attitude                    |
| Mangione 1991 [53], RCT, USA                             | 35, Third year                                       | University, NIS              | Auscultation of the heart              | Software Program                        | 6 weeks                      | Traditional learning | 1) Knowledge<br>2) Attitude                    |
| McDonough 2002 [54], RCT, UK                             | 37, Third year                                       | University, NR               | Psychiatry                             | Software Program                        | 1.5 hours                    | Traditional learning | 1) Knowledge<br>2) Satisfaction                |
| Mojtahedzadeh 2014 [55], RCT, Iran                       | 61, Third year                                       | University, NIS              | Physiology of hematology and oncology  | CD-ROM                                  | 2.5 hours                    | Traditional learning | 1) Knowledge<br>2) Satisfaction                |

|                                                    |                            |                 |                                                      |                  |                         |                      |                                 |
|----------------------------------------------------|----------------------------|-----------------|------------------------------------------------------|------------------|-------------------------|----------------------|---------------------------------|
| Nola 2005 [56], cRCT <sup>a</sup> , Croatia        | 225, Not specified         | University, NIS | Pathology                                            | Software Program | 1 term                  | Traditional learning | Knowledge                       |
| Perfeito 2008 [57], RCT, Brazil                    | 35, Fourth year            | University, NR  | Surgery                                              | CD-ROM           | 1.5 hours               | Traditional learning | 1) Knowledge<br>2) Satisfaction |
| Pusic 2007 [58], RCT, Canada and USA               | 152, Final year            | University, NIS | Radiology                                            | Software Program | 1 hour                  | Software Program     | 1) Knowledge<br>2) Satisfaction |
| Ram 1997 [59], RCT, Malaysia                       | 64, Final year             | Hospital, NR    | Cardiology                                           | Software Program | 1 hour                  | Traditional learning | Knowledge                       |
| Santer 1995 [60], RCT, USA                         | 179, Third and Fourth Year | University, NR  | Pediatrics                                           | Software Program | 1 hour                  | Traditional learning | 1) Knowledge<br>2) Satisfaction |
| Seabra 2004 [61], RCT, Brazil                      | 60, Second and third year  | University, NR  | Urology                                              | Software Program | 2 hours                 | Traditional learning | 1) Knowledge<br>2) Satisfaction |
| Shomaker 2002 [62], RCT, USA                       | 94, Second year            | University, NR  | Parasitology                                         | Software Program | 26.8 hours <sup>h</sup> | Traditional learning | 1) Knowledge<br>2) Satisfaction |
| Solomon 2004 [63], RCT, USA                        | 29, Third year             | University, NIS | Learning concepts (Digital and Live Lecture formats) | CD-ROM           | -                       | Traditional learning | Knowledge                       |
| Stanford 1994 [64], RCT, USA                       | 175, First year            | University, NIS | Anatomy (Cardiac Anatomy)                            | Software Program | 47.91 minutes (average) | Traditional learning | 1) Knowledge<br>2) Satisfaction |
| Summers 1999 [65], RCT, USA                        | 69, First year             | University, NIS | Surgery                                              | Software Program | 6.75 hours              | Traditional learning | 1) Knowledge<br>2) Skill        |
| Taveira-Gomes 2015 [66], RCT, Portugal             | 96, Fourth and fifth year  | University, NR  | Cellular Biology                                     | Software Program | 1 hour                  | Software Program     | Knowledge                       |
| Vichitvejpaisal 2001 [67], RCT, Thailand           | 80, Third year             | University, NIS | Arterial Blood Gas Interpretation                    | Software Program | 1 day                   | Traditional learning | Knowledge                       |
| Vivekananda-Schmidt 2005 [68], RCT, UK (Newcastle) | 241, Third year            | University, NIS | Orthopedics (Musculoskeletal Examination Skills)     | CD-ROM           | 1 hour                  | Traditional learning | 1) Skill<br>2) Cost             |
| Vivekananda-Schmidt 2005a [68], RCT, UK (London)   | 113, Third year            | University, NIS | Orthopedics (Musculoskeletal Examination Skills)     | CD-ROM           | 1 hour                  | Traditional learning | 1) Skill<br>2) Cost             |

Footnotes

<sup>a</sup>Number of participants, <sup>b</sup>randomized controlled trial, <sup>c</sup>Not reported, <sup>d</sup>Compact Disc Read Only Memory, <sup>e</sup>Industrial Sponsorship, <sup>f</sup>Non-industrial sponsorship, <sup>g</sup>cluster randomized controlled trial <sup>h</sup>Average time
