# Supplementary material for: Offline Digital Education for Medical Students: Systematic Review and Meta-Analysis by the Digital Health Education Collaboration
Source: PubMed Central journal article supplement (PMC6452290; doi:10.2196/13165), 2019-03-25
Supplement: jmir_v21i3e13165_app3.pdf [file jmir_v21i3e13165_app3.pdf]

Multimedia Appendix 3: Results of the included studies.

| Primary outcomes           |                                                            |                                                               |                    |                    |                 |                    |                              |                     |                                       |
|----------------------------|------------------------------------------------------------|---------------------------------------------------------------|--------------------|--------------------|-----------------|--------------------|------------------------------|---------------------|---------------------------------------|
| Study ID, N <sup>a</sup>   | Type(s) of comparison                                      | Timing of outcome assessment (Postintervention and follow-up) | Intervention group |                    | Control group   |                    | Between-group difference     |                     | Standardized Mean Difference (95% CI) |
|                            |                                                            |                                                               | Mean               | Standard deviation | Mean            | Standard deviation | Mean difference <sup>b</sup> | 95% CI <sup>b</sup> |                                       |
| <b>Knowledge</b>           |                                                            |                                                               |                    |                    |                 |                    |                              |                     |                                       |
| Amesse et al 2008, 36      | Offline digital education versus traditional learning      | Postintervention                                              | 74                 | 11                 | 67              | 12                 | 7                            | -0.52, 14.52        | 0.59 (-0.07, 1.26)                    |
| Armstrong et al 2009, 21   | Offline digital education versus traditional learning      | Postintervention                                              | 68.8               | 10.54              | 73.3            | 17.75              | -4.50                        | -16.68, 7.68        | -0.29 (-1.15, 0.58)                   |
| Carrero et al 2009, 68     | Offline digital education versus traditional learning      | Postintervention                                              | 2.3                | 0.38               | 2.3             | 0.38               | 0.00                         | -0.18, 0.18         | 0 (-0.48, 0.48)                       |
| Davis et al 2008, 229      | Offline digital education versus traditional learning      | Postintervention                                              | 0.8                | 3.2                | 1.3             | 2.4                | -0.8                         | -1.4, -0.1          | -0.18 (-0.48, 0.12)                   |
| de Jong et al 2010, 107    | Offline digital education versus traditional learning      | Postintervention                                              | 6.6                | 1                  | 6.6             | 1.1                | 0.00                         | -0.40, 0.40         | 0 (-0.40, 0.40)                       |
| Desch et al 1991, 78       | Offline digital education versus traditional learning      | Postintervention                                              | 19.4               | 0.7                | 18.8            | 1.04               | 0.60                         | 0.12, 1.08          | 0.67 (0.11, 1.23)                     |
| Devitt and Palmer 1999, 90 | Offline digital education versus offline digital education | At 2 weeks postintervention                                   | 37.8               | 2.7                | 32.9            | 3.2                | 4.90                         | 3.16, 6.64          | 1.62 (0.93, 2.31)                     |
| Elves et al 1997, 26       | Blended digital education versus traditional learning      | At 1 week postintervention                                    | 10.2               | 4.0                | 5.0             | 3.5                | 5.20                         | 2.31, 8.09          | 1.34 (0.48, 2.20)                     |
| Fasce et al 1995, 100      | Offline digital education versus traditional learning      | Postintervention                                              | 71.4               | -                  | 64.6            | -                  | -                            | -                   | -                                     |
| Finley et al 1998, 40      | Offline digital education versus offline digital education | At 3 days postintervention                                    | -                  | -                  | -               | -                  | -                            | -                   | -                                     |
| Gelb 2001, 107             | Offline digital education versus traditional learning      | Postintervention, At 26 days postintervention                 | 6.7                | 1.8                | 6.5             | 2.2                | 0.2                          | -0.56, 0.96         | 0.10 (-0.28, 0.48)                    |
| Green and Levi 2011, 121   | Offline digital education versus traditional learning      | Postintervention                                              | 88 <sup>c</sup>    | -                  | 85 <sup>c</sup> | -                  | -                            | -                   | -                                     |
| Hilger et al 1996, 75      | Offline digital education versus traditional learning      | At 3-4 weeks postintervention                                 | 78.4               | -                  | -               | 73.4               | -                            | -                   | -                                     |

|                              |                                                            |                                             |                 |               |                 |               |              |                             |                                          |
|------------------------------|------------------------------------------------------------|---------------------------------------------|-----------------|---------------|-----------------|---------------|--------------|-----------------------------|------------------------------------------|
| Holt et al 2001, 185         | Offline digital education versus traditional learning      | Postintervention                            | 64.8            | 19.83         | 69.8            | 25.69         | -5           | -0.51, 0.08                 | -0.22 (-0.60, 0.16)                      |
| Hudson 2004, 100             | Offline digital education versus offline digital education | Postintervention                            | 66 <sup>d</sup> | -             | 70 <sup>e</sup> | -             | -            | -                           | -                                        |
| Lee et al 1997, 82           | Offline digital education versus traditional learning      | Postintervention                            | 12.3            | 1.64          | 12.7            | 1.98          | -0.4         | -1.18, 0.38                 | -0.22 (-0.65, 0.22)                      |
| MacFadyen et al 1993, 54     | Offline digital education versus traditional learning      | Postintervention                            | 58.0            | 5.0           | 60.0            | 5.0           | -2.00        | -4.67, 0.67                 | -0.39 (-0.93, 0.15)                      |
| Mangione et al 1991, 35      | Offline digital education versus traditional learning      | At 6 weeks postintervention                 | -               | -             | -               | -             | -            | -                           | -                                        |
| McDonough and Marks 2002, 37 | Offline digital education versus traditional learning      | Postintervention                            | 57.1            | 13.5          | 66.5            | 14.6          | -9.40        | -18.47, -0.33               | -0.65 (-1.32, 0.01)                      |
| Mojtahadzadeh et al 2014, 61 | Offline digital education versus traditional learning      | Postintervention                            | 13.7            | 1.1           | 13.5            | 1.2           | 0.20         | -0.40, 0.80                 | 0.17 (-0.35, 0.69)                       |
| Nola et al 2005, 225         | Offline digital education versus traditional learning      | Postintervention                            | 81.9            | 9.8           | 73.3            | 14.2          | 8.60         | 5.13, 12.07                 | 0.64 (0.32, 0.96)                        |
| Perfeito et al 2008, 35      | Offline digital education versus traditional learning      | Postintervention                            | 7.1             | 0.87          | 6.8             | 1.02          | 0.31         | -0.32, 0.94                 | 0.31 (-0.36, 0.98)                       |
| Pusic et al 2007, 152        | Offline digital education versus offline digital education | Postintervention                            | 3.9             | 1.2           | 3.9             | 1.2           | 0.00         | -0.33, 0.33                 | 0.00 (-0.33, 0.33)                       |
| Ram 1997, 64                 | Offline digital education versus traditional learning      | Postintervention                            | 57.4            | 8.7           | 46.5            | 7.1           | 10.90        | 7.01, 14.79                 | 1.36 (0.81, 1.90)                        |
| Santer et al 1995, 179       | Offline digital education versus traditional learning      | Postintervention, At 11-22 months follow-up | 16.6<br>15.3    | 2.3<br>2.8    | 15.6<br>14.6    | 3.6<br>2.3    | 1<br>0.70    | -0.34, 2.34<br>-0.82, 2.22  | 0.33 (-0.12, 0.77)<br>0.27 (-0.32, 0.86) |
| Seabra et al 2004, 60        | Offline digital education versus traditional learning      | Postintervention                            | 15.1            | -             | 15.6            | -             | -            | -                           | -                                        |
| Shomaker et al 2002, 94      | Offline digital education versus traditional learning      | Postintervention, At 4 months follow-up     | 88.7<br>57.5    | 6.46<br>19.48 | 88.1<br>52.5    | 6.91<br>12.84 | 0.60<br>1.70 | -2.76, 3.96<br>-8.90, 12.30 | 0.09 (-0.41, 0.59)<br>0.30 (-0.20, 0.81) |
| Solomon et al 2004, 29       | Offline digital education versus traditional learning      | Postintervention                            | 4.8             | 2             | 4.4             | 1.08          | 0.40         | -0.73, 1.53                 | 0.23 (-0.51, 0.97)                       |
| Stanford et al 1994, 175     | Offline digital education versus traditional learning      | Postintervention                            | 41.5            | 18            | 41.7            | 13.6          | -0.20        | -6.87, 6.47                 | -0.01 (-0.43, 0.41)                      |
| Summers et al 1999, 69       | Offline digital education versus traditional learning      | Postintervention, At 1 month follow-up      | 49<br>-         | -<br>-        | 63<br>-         | -<br>-        | -14<br>-     | -<br>-                      | -<br>-                                   |

|                                                 |                                                            |                                               |                                      |               |                                      |               |                |                              |                                             |
|-------------------------------------------------|------------------------------------------------------------|-----------------------------------------------|--------------------------------------|---------------|--------------------------------------|---------------|----------------|------------------------------|---------------------------------------------|
| Taveira-Gomes et al 2015, 96                    | Offline digital education versus offline digital education | Postintervention, At 1 week follow-up         | 72.7<br>82.3                         | 18.3<br>15    | 33<br>42                             | 18<br>20.7    | 39.70<br>40.30 | 32.51, 46.89<br>33.14, 47.46 | 2.17 (1.67, 2.67)<br>2.21 (1.71, 2.72)      |
| Vichitvejpaisal et al 2001, 80                  | Offline digital education versus traditional learning      | Postintervention, At 3 weeks follow-up        | 57.8<br>48.1                         | 10.74<br>8.54 | 65.8<br>50.0                         | 11.32<br>9.71 | -8.00<br>-1.90 | -12.84, -3.16<br>-5.91, 2.11 | -0.72 (-1.17, -0.27)<br>-0.21 (-0.65, 0.23) |
| <b>Skills</b>                                   |                                                            |                                               |                                      |               |                                      |               |                |                              |                                             |
| Ackermann et al 2010, 20                        | Offline digital education versus traditional learning      | Postintervention                              | 4.1                                  | 2.78          | 3.8                                  | 1.2           | 0.30           | -1.58, 2.18                  | 0.13 (-0.74, 1.01)                          |
| Cheng et al 2017, 41                            | Offline digital education versus traditional learning      | Postintervention                              | 5.5                                  | 1.1           | 1.6                                  | 1.1           | 3.90           | [3.22, 4.58]                 | 3.48 (2.48, 4.48)                           |
| Green and Levi 2011, 121                        | Offline digital education versus traditional learning      | Postintervention                              | -                                    | -             | -                                    | -             | -              | -                            | -                                           |
| Summers et al 1999, 69                          | Offline digital education versus traditional learning      | Postintervention, At 1 month follow-up        | 390 <sup>f</sup><br>427 <sup>f</sup> | -             | 385 <sup>g</sup><br>396 <sup>g</sup> | -             | -              | -                            | -                                           |
| Vivekananda-Schmidt et al 2005 (Newcastle), 241 | Offline digital education versus traditional learning      | Postintervention                              | 20.5                                 | 3.2           | 18.8                                 | 3.2           | 1.70           | 0.69, 2.71                   | 0.53 (0.21, 0.85)                           |
| Vivekananda-Schmidt 2005a et al (London), 113   | Offline digital education versus traditional learning      | At 1-10 months after completion of the module | 15.1                                 | 1.8           | 14.1                                 | 2.4           | 1.00           | 0.20, 1.80                   | 0.46 (0.07, 0.85)                           |
| <b>Attitude</b>                                 |                                                            |                                               |                                      |               |                                      |               |                |                              |                                             |
| Davis et al 2008, 229                           | Offline digital education versus traditional learning      | Postintervention                              | -                                    | -             | -                                    | -             | -              | -                            | -                                           |
| Fasce et al 1995, 100                           | Offline digital education versus traditional learning      | Postintervention                              | 89.4                                 | -             | 46.9                                 | -             | -              | -                            | -                                           |
| Hilger et al 1996, 75                           | Offline digital education versus traditional learning      | Postintervention                              | -                                    | -             | -                                    | -             | -              | -                            | -                                           |
| Mangione et al 1991, 35                         | Offline digital education versus traditional learning      | Postintervention                              | 63.8                                 | 21.1          | -                                    | -             | -              | -                            | -                                           |
| MacFadyen et al 1993, 54                        | Offline digital education versus traditional learning      | Postintervention, At 5 weeks follow-up        | 2.8<br>-                             | 0.14<br>-     | 2.4<br>-                             | 0.1<br>-      | 0.40<br>-      | 0.32, 0.48<br>-              | 2.71 (1.96, 3.47)<br>-                      |
| <b>Satisfaction</b>                             |                                                            |                                               |                                      |               |                                      |               |                |                              |                                             |
| Desch et al 1991, 78                            | Offline digital education versus traditional learning      | -                                             | -                                    | -             | -                                    | -             | -              | -                            | -                                           |
| Elves et al 1997, 26                            | Blended digital education versus traditional learning      | Postintervention                              | 3                                    | 0.9           | -                                    | -             | -              | -                            | -                                           |

|                              |                                                            |                  |                     |              |                 |              |                   |               |                      |
|------------------------------|------------------------------------------------------------|------------------|---------------------|--------------|-----------------|--------------|-------------------|---------------|----------------------|
| Fasce et al 1995, 100        | Offline digital education versus traditional learning      | Postintervention | 89.4                | -            | 98.1            | -            | -                 | -             | -                    |
| Finley et al 1998, 40        | Offline digital education versus offline digital education | -                | -                   | -            | -               | -            | -                 | -             | -                    |
| Gelb 2001, 107               | Offline digital education versus traditional learning      | -                | -                   | -            | -               | -            | -                 | -             | -                    |
| Green and Levi 2011, 121     | Offline digital education versus traditional learning      | Postintervention | 7.8                 | -            | 5.6             | -            | -                 | -             | -                    |
| McDonough and Marks 2002, 37 | Offline digital education versus traditional learning      | Postintervention | 3.5                 | 2            | 5.8             | 1.3          | -2.30             | -3.38, -1.22  | -1.33 (-2.05, -0.61) |
| Lee et al 1997, 82           | Offline digital education versus traditional learning      | Postintervention | 2.6                 | 1.1          | 2.5             | 1.1          | 0.10              | -0.38, 0.58   | 0.09 (-0.35, 0.53)   |
| Mojtahedzadeh et al 2014, 61 | Offline digital education versus traditional learning      | Postintervention | 1.93                | -            | 2.31            | -            | -                 | -             | -                    |
| Perfeito et al 2008, 35      | Offline digital education versus traditional learning      | -                | -                   | -            | -               | -            | -                 | -             | -                    |
| Pusic et al 2007, 152        | Offline digital education versus offline digital education | Postintervention | 55 <sup>c</sup>     | -            | 81 <sup>c</sup> | -            | -                 | -             | -                    |
| Santer et al 1995, 179       | Offline digital education versus traditional learning      | -                | -                   | -            | -               | -            | -                 | -             | -                    |
| Seabra et al 2004, 60        | Offline digital education versus traditional learning      | -                | -                   | -            | -               | -            | -                 | -             | -                    |
| Shomaker et al 2002, 94      | Offline digital education versus traditional learning      | -                | -                   | -            | -               | -            | -                 | -             | -                    |
| Stanford et al 1994, 175     | Offline digital education versus traditional learning      | -                | -                   | -            | -               | -            | -                 | -             | -                    |
|                              |                                                            |                  | <b>Intervention</b> |              | <b>Control</b>  |              | <b>Risk Ratio</b> | <b>95% CI</b> |                      |
|                              |                                                            |                  | <b>Events</b>       | <b>Total</b> | <b>Events</b>   | <b>Total</b> | -                 | -             |                      |
| Armstrong et al 2009, 21     | Offline digital education versus traditional learning      | Postintervention | 9                   | 9            | 10              | 12           | 1.18              | 0.87, 1.59    |                      |
| de Jong et al 2010, 107      | Offline digital education versus traditional learning      | Postintervention | 15                  | 38           | 39              | 45           | 0.46              | 0.30, 0.69    |                      |
| Holt et al 2001, 185         | Offline digital education versus traditional learning      | Postintervention | 36                  | 42           | 0               | 0            | -                 | -             |                      |

*Footnotes*

<sup>a</sup>Number of participants, <sup>b</sup>Mean Differences and Confidence Intervals were calculated based on RevMan5.3 built-in function, <sup>c</sup>Percentage of the correct responses, <sup>d</sup>Didactic group, <sup>e</sup>Free text group, <sup>f</sup>Performance Quotient (PQ) score of computer-based training group, <sup>g</sup>PQ score of didactic training group, “-“ = Not Available.
