# Supplementary material for: Offline Digital Education for Medical Students: Systematic Review and Meta-Analysis by the Digital Health Education Collaboration
Source: PubMed Central journal article supplement (PMC6452290; doi:10.2196/13165), 2019-03-25
Supplement: jmir_v21i3e13165_app4.pdf [file jmir_v21i3e13165_app4.pdf]

## Multimedia Appendix 4: Risk of Bias for Cluster RCT

| Study ID                             | Recruitment bias                                                                                                                                                                                                                                                                                                                                                                                                      | Baseline imbalance                                               | Loss of clusters                                                                             | Incorrect analysis                                                                                                                                                                                                          | Comparability with individual trials                                                                                                       |
|--------------------------------------|-----------------------------------------------------------------------------------------------------------------------------------------------------------------------------------------------------------------------------------------------------------------------------------------------------------------------------------------------------------------------------------------------------------------------|------------------------------------------------------------------|----------------------------------------------------------------------------------------------|-----------------------------------------------------------------------------------------------------------------------------------------------------------------------------------------------------------------------------|--------------------------------------------------------------------------------------------------------------------------------------------|
| Vivekananda-Schmidt 2005 (Newcastle) | Low<br>Recruitment of participants were carried out before randomization of clusters. It was mentioned in Figure 5 of the study.                                                                                                                                                                                                                                                                                      | low<br>No baseline difference was reported                       | Unclear<br>Loss of cluster was not reported.                                                 | Low<br>Analysis was carried out using a hierarchical linear regression with 2 levels (cluster level and student level). "Cluster" was entered as a random variable to account for the variance between individual clusters. | Unclear<br>Comparison between cRCT and RCT could not be made due to heterogeneity in the specialization of participants and interventions. |
| Vivekananda-Schmidt 2005a (London)   | Low<br>Recruitment of participants were carried out before randomization of clusters. It was mentioned in Figure 5 of the study.                                                                                                                                                                                                                                                                                      | low<br>No baseline difference was reported.                      | Unclear<br>Loss of cluster was not reported.                                                 | Low<br>Analysis was carried out using a hierarchical linear regression with 2 levels (cluster level and student level). "Cluster" was entered as a random variable to account for the variance between individual clusters. | Unclear<br>Comparison between cRCT and RCT could not be made due to heterogeneity in the specialization of participants and interventions. |
| Nola 2005                            | Unclear<br>48 of the class of 225 students (20%) randomly enrolled in the computer-based teaching program and the remaining 80% of students of the same class were enrolled in the traditional teaching program used at the Zagreb University School of Medicine. Moreover, the author didn't report about cluster-randomization of the participants even though it mentioned the students were randomized in groups. | Unclear<br>Baseline differences were not reported in this study. | High<br>Missing outcomes for individuals within clusters may lead to a risk of bias in cRCT. | Unclear<br>No sufficient information to make judgement.                                                                                                                                                                     | Unclear<br>Comparison between cRCT and RCT could not be made due to heterogeneity in the specialization of participants and interventions. |

### Footnotes

RCT = Randomized controlled trial, cRCT = cluster RCT
